# Supplementary material for: Flame-retardant and form-stable phase change composites based on black phosphorus nanosheets/cellulose nanofiber aerogels with extremely high energy storage density and superior solar-thermal conversion efficiency
Source: Royal Society of Chemistry journal article supplement (doi:10.1039/d0ta05078d), 2020-01-01
Supplement: d0ta05078d1.pdf [file d0ta05078d1.pdf]

## Supporting information

### **Flame-retardant and form-stable phase change composites based on black phosphorus nanosheets/cellulose nanofiber aerogels with extremely high energy storage density and superior solar-thermal conversion efficiency**

Xiaosheng Du<sup>a,b</sup>, Jinghong Qiu<sup>a</sup>, Sha Deng<sup>a</sup>, Zongliang Du<sup>a,b</sup>, Xu Cheng<sup>a,b</sup>, and Haibo Wang<sup>\*a,b</sup>

<sup>a</sup> College of Biomass Science and Engineering, Sichuan University, No.24 South Section 1, Yihuan Road, Chengdu, 610065, China.

<sup>b</sup> The Key Laboratory of Leather Chemistry and Engineering of Ministry of Education, Sichuan University, Chengdu 610065, PR China.

\* Corresponding Authors: E-mail: whb6985@scu.edu.cn. Tel: 86-28-85401296.

Number of pages: 3

Number of figures: 2

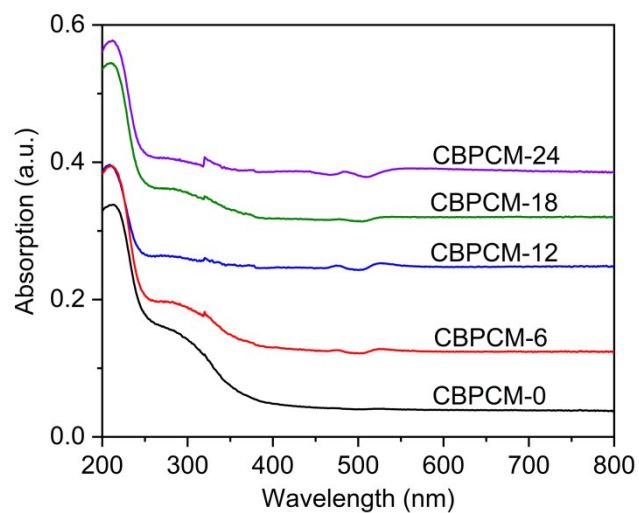

**Fig. S1** UV-vis-NIR absorption spectra of CBPCMs.

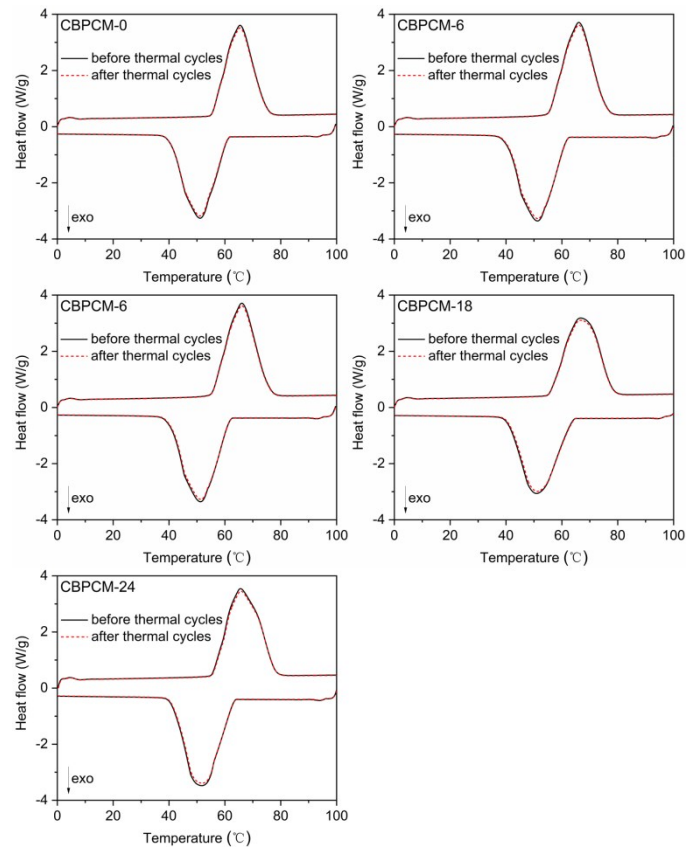

**Fig. S2** DSC curves of CBPCMs before and after 100 thermal cycles.
